# Supplementary material for: Differential effects of climate and species interactions on range limits at a hybrid zone: potential direct and indirect impacts of climate change
Source: PubMed Central journal article supplement (PMC4662315; doi:10.1002/ece3.1774), 2015-10-19

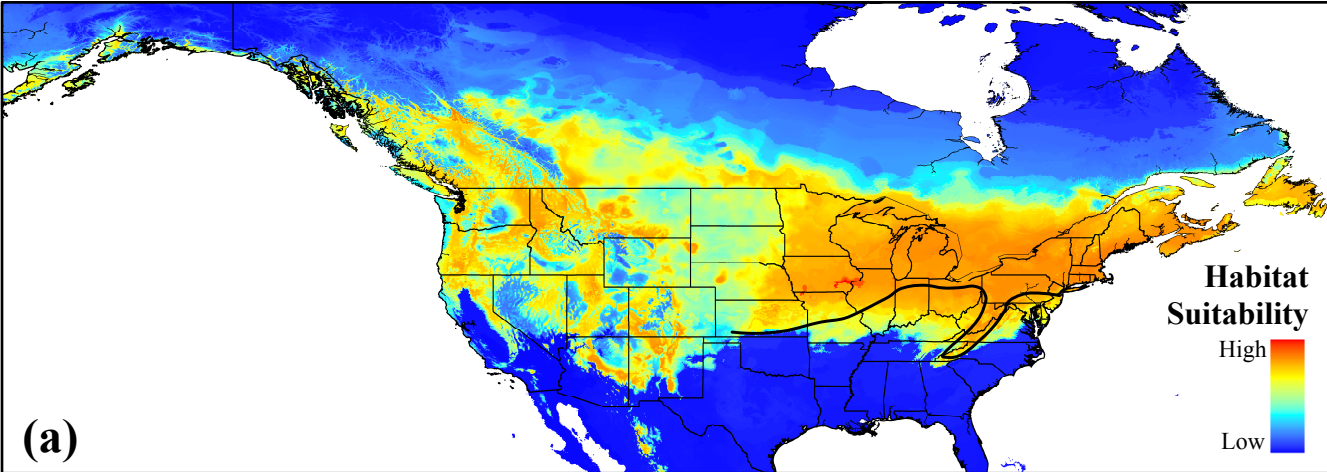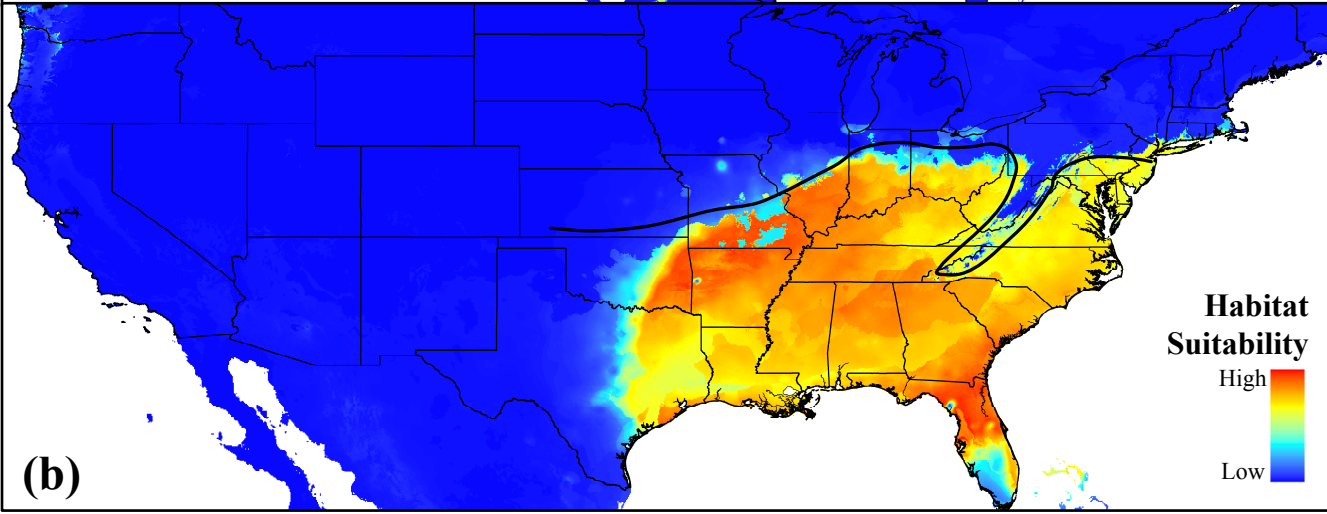

Supplement: ECE3-5-5120-s004.pdf [file ECE3-5-5120-s004.pdf]
