# Supplementary material for: Differential effects of climate and species interactions on range limits at a hybrid zone: potential direct and indirect impacts of climate change
Source: PubMed Central journal article supplement (PMC4662315; doi:10.1002/ece3.1774), 2015-10-19

**Response of *Poecile atricapillus* to Annual Mean Temp. (Bio1)**

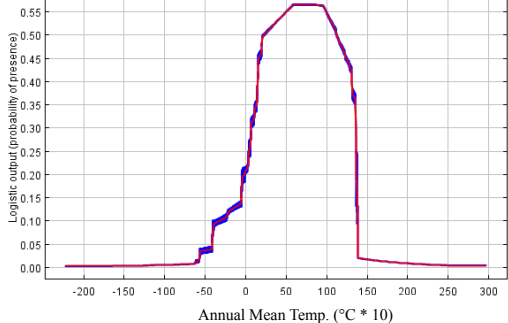

**Response of *Poecile carolinensis* to Annual Mean Temp. (Bio1)**

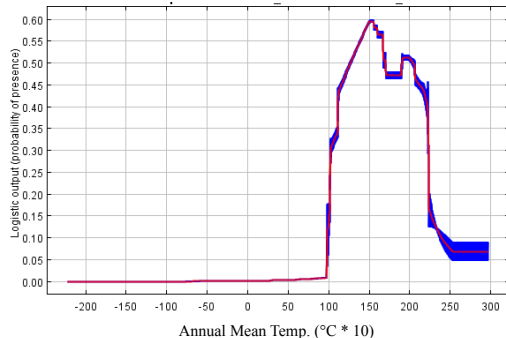

**Response of *Poecile atricapillus* to Max. Temp. of Warmest Month (Bio5)**

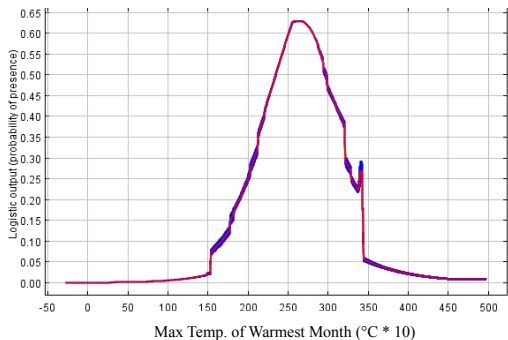

**Response of *Poecile carolinensis* to Precipitation of Driest Quarter (Bio17)**

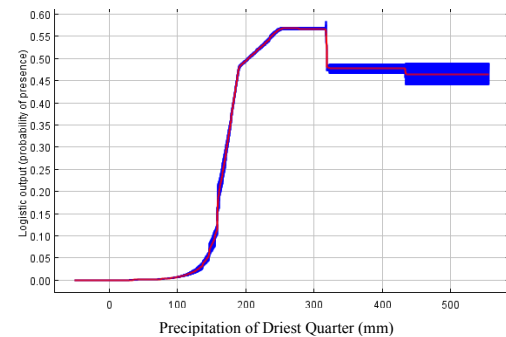

**Response of *Poecile atricapillus* to Precipitation of Driest Quarter (Bio17)**

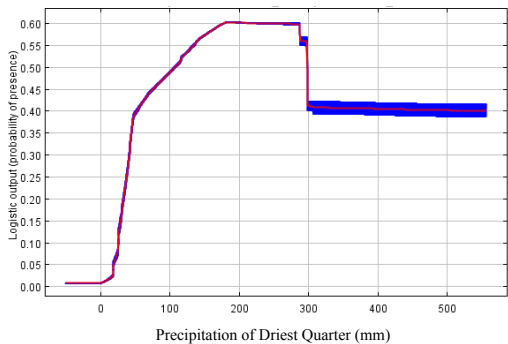

**Response of *Poecile carolinensis* to Mean Temp. of Warmest Quarter (Bio10)**

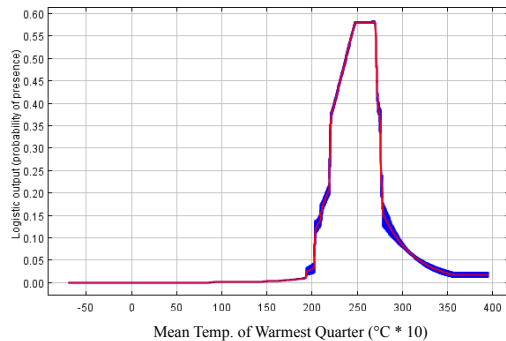

Supplement: ECE3-5-5120-s005.pdf [file ECE3-5-5120-s005.pdf]
